# Supplementary material for: siPools: highly complex but accurately defined siRNA pools eliminate off-target effects
Source: PubMed Central journal article supplement (PMC4081087; doi:10.1093/nar/gku480), 2014-05-28

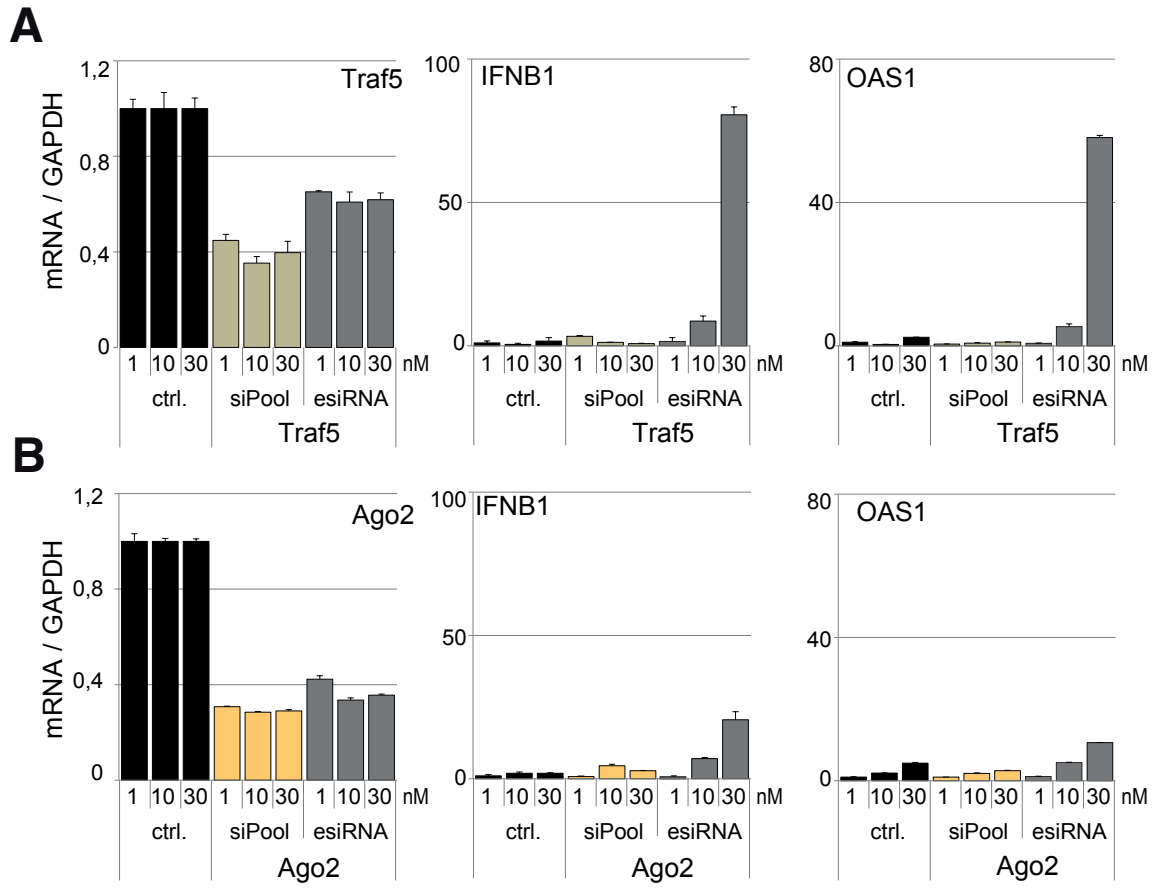

Supplement: supp_gku480_nar-03360-y-2013-File010.pdf [file supp_gku480_nar-03360-y-2013-File010.pdf]
